# Supplementary material for: Early evidence of fire in south-western Europe: the Acheulean site of Gruta da Aroeira (Torres Novas, Portugal)
Source: PubMed Central journal article supplement (PMC7374095; doi:10.1038/s41598-020-68839-w), 2020-07-21
Supplement: 41598_2020_68839_MOESM1_ESM.pdf [file 41598_2020_68839_MOESM1_ESM.pdf]

# Early evidence of fire in south-western Europe: the Acheulean site of Gruta da Aroeira (Torres Novas, Portugal)

Montserrat Sanz<sup>1,2,\*</sup>, Joan Daura<sup>1,2</sup>, Dan Cabanes<sup>3</sup>, Natalia Égüez<sup>4</sup>, Ángel Carrancho<sup>5</sup>, Ernestina Badal<sup>6</sup>, Pedro Souto<sup>7</sup>, Filipa Rodrigues<sup>2</sup>, João Zilhão<sup>2,8-9</sup>

<sup>1</sup>Grup de Recerca del Quaternari (GRQ-SERP), Departament d'Història i Arqueologia, Universitat de Barcelona, Carrer Montalegre, 6, 08001 Barcelona, Spain

<sup>2</sup>UNIARQ-Centro de Arqueologia da Universidade de Lisboa, Faculdade de Letras. Universidade de Lisboa, 1600-214 Lisbon, Portugal.

<sup>3</sup>Department of Anthropology, Rutgers University, Biological Sciences Building, 32 Bishop Street, New Brunswick, NJ 08901, USA

<sup>4</sup>Archaeological Micromorphology and Biomarkers - AMBI Lab, Instituto Universitario de Bio-Orgánica Antonio González. Universidad de La Laguna, 38206 Tenerife, Spain.

<sup>5</sup>Área de Prehistoria. Dpto. Historia, Geografía y Comunicación. Edificio I+D+i. Universidad de Burgos. Plaza Misael Bañuelos s/n. 09001 Burgos, Spain.

<sup>6</sup>PREMEDOC-GIUV2015-213, Departament de Prehistòria, Arqueologia i Història Antiga, Universitat de València, Av. Blasco Ibañez 28, 46010 Valencia, Spain

<sup>7</sup>STEA - Sociedade Torrejana de Espeleologia e Arqueologia, Quinta da Lezíria, 2350-510 Torres Novas, Portugal.

<sup>8</sup>Departament d'Història i Arqueologia. Universitat de Barcelona, Carrer Montalegre, 6, 08001 Barcelona, Spain

<sup>9</sup>Institució Catalana de Recerca i Estudis Avançats (ICREA), Passeig Lluís Companys 23, 08010 Barcelona, Spain

\*Corresponding author: [montsesanzborras@ub.edu](mailto:montsesanzborras@ub.edu)

## SUPPLEMENTARY TEXT 1

### 1. Site description

The Gruta da Aroeira (39° 30' 20" N; 08° 36' 57" W) forms part of the Almonda karst system and is located in the Central Limestone Massif of Estremadura in the municipality of Torres Novas (Santarém, Portugal). The cave is at 139 m a.s.l. and corresponds to an ancient outlet of the river Almonda (Supplementary Fig. S1).

The site was speleologically discovered by STEA (*Sociedade Torrejana de Espeleologia e Arqueologia*) in 1991, when explorations identified a network of passages (*Galerias Pesadas*) sealed by a cone of sediments containing Middle Pleistocene faunal remains and artefacts<sup>1</sup>. *Galerias Pesadas* was, in fact, the name erroneously used in the first fieldwork (1998-2002) undertaken on the sedimentary fills exposed in both the cliff face and the reopened cave entrance<sup>2</sup>; this designation actually corresponds to the interior conduits of the karst system. The designation given in 1991 to the reopened cave entrance excavated 1997-2002 and 2013-2017 is Gruta da Aroeira.

In 2013, archaeological work resumed. The focus was on excavating and sampling the area at the back of the cave, corresponding to grid squares H6 to H8, I6 to I8, and J6 to J8 (Figure 9 and Supplementary Fig. S1), with the aim of reaching bedrock and establishing the time depth of the archaeological deposit, for which previously dated speleothem samples provided a minimum age of ~400 ka<sup>3</sup>. At the back of the cave, the stratigraphic sequence comprises three major units with an overall thickness of 4 m. The uppermost unit, Unit 1, is a brecciated infill capped by flowstone dated to 44.8±2.0 ka (2σ). Unit 2 is a 2.2-m thick mud-supported breccia, rich in angular and sub-rounded clasts, corresponding to Acheulean layers X-Xb/c (which are the upper and lower parts of a single layer, excavated in 1998–2002 and 2013–2017, respectively), and is capped by a second flowstone whose base dates to 418/+37/–27 ka (2σ). Unit Xc, which yielded most of the fire evidence, is composed mainly of silty sand with dispersed gravel (Figures 9 and Supplementary Fig. S1). The basal unit, Unit 3, is an endokarst fluvial deposit, comprising two layers: XI is a 0.4 m-thick silty sand with scattered gravel and faunal remains but no artefacts, and XII is a 0.5 m-thick, archaeologically sterile, slightly gravelly sand. The external layer of a stalagmite column, which, based on available cross-sectional views, seems to have grown from the top of layer XII and to have been buried by subsequent infilling (Units 1 and 2), dates to 406±30 ka (2σ), providing a maximum

age for layer X, the deposition of which can, therefore, be dated to the 390-436 ka interval<sup>4</sup>.

The archaeological remains retrieved in layer Xb/c are mostly lithic artefacts and faunal remains. It also yielded the human cranium Aroeira 3. The faunal remains are highly fragmented, consisting primarily of isolated teeth, phalanges, carpal/tarsal bones, and antler fragments. Among the faunal remains from layer Xb/c, cervids<sup>5</sup> and equids predominate. Rarer species include Rhinocerotidae (likely *Stephanorhinus* cf. *hundsheimensis*), bear (*Ursus* sp.), as well as large bovid, caprids (Caprinae), tortoise (*Testudo* sp.) and a macaque (*M. sylvanus* cf. *pliocena*)<sup>6</sup>.

## **SUPPLEMENTARY TEXT 2**

### **2. Materials and Methods**

#### **2.1. Excavation methodology**

The current study uses the finds made during the fieldwork undertaken between 2013 and 2017. The material collected 1998–2002 is not included<sup>2,7</sup>. The position of all finds was recorded in three-dimensions within a 1 m<sup>2</sup> grid system, identified by letter and number. Small items and fragments were bagged by 1 m<sup>2</sup> units of provenience.

Excavation used a demolition hammer, as both archaeological and palaeontological remains were completely encased in rock-hard carbonate breccias. Lithics and bones were subsequently extracted from the rock using a pneumatic micro-hammer and micro-chisel (Mod. CTS 178) and normal air scribe (Mod. W 224). After cleaning, bone fragments were joined and a final thin layer of consolidant (Paraloid B-72), dissolved in acetone, was applied to the entire surface. The burnt remains were not consolidated.

#### **2.2. Zooarchaeological and taphonomic analyses**

A total of 43 burnt bone remains recovered from layer Xb/c were analysed in this study (Supplementary Table S1). The zooarchaeological analysis involved identification of animal bones to genus or species level where possible. The anatomical region of origin of the bone remains (cranial, axial and appendicular) was determined, along with the skeletal element, portion of element, side and age (infantile, juvenile, adult or senile), following standard zooarchaeological methods<sup>8,9</sup>. Non-identifiable fragments were assigned to broader anatomical categories in relation to their skeletal tissue (e.g. flat, long or spongy bone) and body-size categories (e.g. small mammal or medium ungulate).

To determine the effects of biostratinomical and post-depositional processes, bones were examined following standard criteria<sup>10,11</sup>, although taphonomic analyses focused primarily on the thermal alteration of bone surfaces. The damage attributable to burning was described by colour (naked eye) using the six-grade scale proposed by Stiner<sup>12</sup>: (1) slightly burned, (2) more than half carbonized, (3) fully carbonized, (4) slightly calcined, (5) more than half calcined and (6) fully calcined (completely white in colour). Burned bone surfaces were analysed at the macroscopic level under a binocular device (NIKON

SMZ800) housed at the *Centro de Investigación UCM-ISCIH sobre la Evolución y Comportamiento Humanos* in Madrid.

### **2.3. FTIR**

A total of 13 loose sediment samples (samples ID #77-89) and 19 bone samples were collected for Fourier transform infrared spectroscopy (FTIR) analysis from layers F, Xb, Xc and XI (Supplementary Table S1). Thermal alteration in bone samples was determined visually and the bones were classified in line with Stiner<sup>12</sup>. In addition, four sediment samples associated with burnt bones were analysed.

The analyses were performed using a Thermo Scientific Nicolet iS5 FT-IR spectrometer in the Laboratory for MicroArchaeology in the Department of Anthropology (ALMA) at Rutgers University. Approximately 1 mg of each sample was ground and mixed with 80 mg of KBr in an agate mill. Infrared spectra were obtained by scanning the samples 32 times at 4 cm<sup>-1</sup>. In the sediment samples, the geogenic or anthropogenic (i.e., ash) origin of calcite was determined in line with Regev and Poduska<sup>13,14</sup>, and clays exposed to high temperatures were identified using specific absorptions in the clay spectrum<sup>15</sup>. In the bone samples, the crystallinity index was calculated using the splitting factor (SF) of bone in the FTIR spectra in line with Weiner and Bar-Yosef<sup>16</sup> and the C/P ratio was estimated in line with Wright and Schwarcz<sup>17</sup>. Since the grinding intensity employed can affect the SF<sup>18</sup>, we used grinding curves to address this issue. To obtain these curves, a small bone fragment was first gently ground to produce a pellet. Once the initial spectrum had been recorded, the pellet was returned to the mortar, lightly ground, to produce a new pellet, and a new measurement taken. Each grinding produced a slightly different SF and narrower peaks, indicating that as the particle size was reduced, absorbance in the spectra increased. This operation was repeated until the spectrum obtained had a noisy aspect and measurements were no longer reliable.

### **2.4. Energy-dispersive X-ray spectroscopy**

A JEOL JSM-7600F SEM was used in the scanning microscopy studies. An INCA OXFORD detector for X-ray energy dispersive spectroscopy, XEDS, was attached to the microscope, which was operated at 15 kV and at a 10 mm working distance. These

analyses were carried out at the ICTS laboratory of the *Centro Nacional de Microscopía Electrónica (Universidad Complutense de Madrid)*.

The specimens were first inspected visually to define areas of interest, from which three or four very small grains were obtained by gently scratching the surface. The grains were placed on carbon tape and attached to the metallic sample holder. The composition of each grain was analysed at several points.

The results of the X-ray diffraction pattern obtained on seven burned bone samples are shown in Supplementary Table S3. To assess test validity and result reliability, three additional controls were used. Thus, we tested manganese coating on two additional samples – a deer tooth (sample ID # 90) and a long bone (sample ID # 91) (Supplementary Table S1 and Supplementary Fig. S2) – recovered from Praia das Bifaces (Entrada do Vale da Serra) in the same network of the Almonda karst system<sup>1</sup>. The third sample was a bone from layer X that presented no thermal alteration (sample ID #92) (Supplementary Table S1 and Supplementary Fig. S2). All three controls were treated in exactly the same way as the specimens described above.

## **2.5. Wood charcoal**

The identification of wood material with the naked eye was not feasible during fieldwork; thus, 16 small samples were collected based on their dark, grey or black appearance (Supplementary Table S1: samples ID #44-59). These samples were integrated in compact sediment and the charred organic remains were first separated and placed in a sterilized petri dish with the help of a scalpel using a low power Leica M165C stereomicroscope in the *Laboratori d'Arqueologia (Universitat de València)*. Selected remains were photographed using Leica Application Suite V3 and Helicon Focus 3.10.3 software.

The anatomical identification of the charred remains was carried out using a Leica DM6000 M optical microscope used in bright and dark field modes and polarization. Biometric measurements were recorded using Leica Applications Suite (LAS X). We used a Hitachi S-4100 and Hitachi S4800 scanning electron microscope (SEM) with spotlight of field emission and digital image acquisition system QUANTAX 200 to observe specific features and to obtain high-quality images. The microscope was operated at 10 kV and a 15-mm working distance. For SEM observation, the archaeological material was fixed by carbon tape to the slide, metallized with gold-palladium to facilitate

conductivity and subjected to vacuum. The elemental analyses were performed using a Hitachi S4800 SEM with a Bruker 1110 CHNS X-ray spectroscopy device and the ESPRIT 1.9 software.

Wood consists of organic matter: cellulose (~50%), lignin (20–30%), hemicellulose (15–25%) and a low proportion of minerals (~1%)<sup>19</sup>. The chemical elements in wood are carbon, oxygen, hydrogen and nitrogen; the latter and others occur in very low quantities. The proportion of these elements varies slightly from one species to another and even among the different parts of an individual plant<sup>20</sup>. According to Sawerysyn<sup>19</sup>, the elemental composition of dry wood is 50% carbon, 44% oxygen and 6% hydrogen. Wood also contains small quantities of minerals, such as copper, magnesium and zinc, which are always below 1% of its mass, but they can be 10 times more abundant in the bark<sup>20</sup>.

Elemental analyses using energy dispersive X-ray were carried out on two plant samples (samples ID #48-49) and compared with the results from other Palaeolithic sites to confirm burning. All measurements were made at 5000X.

## 2.6. Micromorphology

Micromorphology analysis was conducted on four thin sections, measuring 13.5 × 5.5 cm and with a thickness of 25 µm, prepared from three undisturbed sediment blocks: samples ID #60-62 (Supplementary Fig. S4), collected during the 2015 fieldwork campaign. The blocks were impregnated with a Palatal® P 4, an unsaturated polyester resin based on orthophthalic acid and standard glycols, dissolved in styrene. The four thin sections were manufactured by the micromorphology laboratory service of the *Departament de Medi Ambient i Ciències del Sòl (Universitat de Lleida)*. Microscopic analysis was performed using a polarizing microscope (Nikon E600) at ×20, ×40, ×100, ×200 and ×400 magnifications under plane-polarized light (PPL), crossed polarized light (XPL), and oblique incident light (OIL). Microphotographs were taken using a Nikon Digital Sight DS-Fi2 camera. Micromorphological descriptions were made in line with standard guidelines<sup>21–24</sup>. The microfacies described were defined by groundmass, microstructure, organic and inorganic composition, and pedofeatures of the lithological changes within an individual thin section<sup>25</sup>.

## 2.7. Organic chemistry

Lipid extraction, identification and quantification were carried out in the Archaeological Micromorphology and Biomarkers (AMBI) Lab of the *Instituto Universitario de Bio-Organica Antonio González (Universidad de La Laguna)*. Two grams for each of two sediment samples taken from layers Xc and XI (samples ID #64 and #65, respectively) were dried at 60 °C for 48 h, then ground and homogenized. Non-volumetric material (including glassware and glass wool) was calcined at 450 °C for 10 h before extraction to eliminate any possible organic compounds. Lipids were extracted in 20 mL of 9:1 dichloromethane/methanol following a modified version of a previously published methodology<sup>26</sup>. Three 30-min sonicator and 10-min centrifuge (4700rpm) cycles were applied to the mixture. The total extract was then evaporated and separated using solid phase extraction (SPE) via silica gel column chromatography into six fractions of different polarities. In this paper, we present results for the *n*-alkane and aromatic fraction, eluted with  $\frac{3}{8}$  of dead volume in *n*-hexane. After addition of 8 mg/L of 5 $\alpha$ -androstane as internal standard (IS), the volume was completed with 150  $\mu$ L of dichloromethane.

The presence of polycyclic aromatic hydrocarbons (PAHs) allows the identification of organic components of combustion structures, even under low combustion temperature conditions, as these molecular compounds are formed under conditions of thermal alteration<sup>27,28</sup>. Alkanes, the hydrocarbon molecules derived largely from epicuticular waxes of plants<sup>29,30</sup>, are present in soils and sediments and are relatively resistant to biodegradation due to their relative hydrophobicity and indigestibility<sup>31</sup>. The distribution of C-numbers in *n*-alkanes within soil and sediment deposits helps identify their source material with terrestrial higher plants producing long-chain *n*-alkane ratios (carbon number C<sub>27</sub> to C<sub>35</sub>), while aquatic plants exhibit short- and medium-chain *n*-alkane ratios (C<sub>17</sub> to C<sub>25</sub>). The compounds in the *n*-alkane and aromatic fraction (polycyclic aromatic hydrocarbons or PAHs) were identified and quantified by gas chromatography using a coupled detection and mass-selective detector (GC-Agilent 7890B, MSD Agilent 5977A) equipped with an HP-5MS capillary column (30 m, ID: 250  $\mu$ m, film thickness: 0.25  $\mu$ m). The GC was programmed to an initial temperature of 70 °C for 2 min, heated with a heating rate of 12 °C/min to 140 °C and to final temperature of 320 °C with a heating rate of 3 °C/min and held for 15 min, with helium as the carrier gas (2 mL/min). To avoid overlap or interferences with other compounds, the total run time was 82.83 min. The multimode injector was held at a split ratio of 5:1 at an initial temperature of 70 °C for



0.85 min and heated to 300 °C at 720 °C/min. All measurements were repeated twice. The MS was operated in full scan mode ( $m/z$  40–580) with an electron ionization energy of 70 eV and with the temperatures of the ion source and quadrupole set at 230 °C and 150 °C, respectively. Quantification was performed by taking the four most intense fragment ions ( $m/z$  43, 57, 71 and 85, and  $m/z$  67, 95, 81 and 245 for IS) for *n*-alkanes and the total ion chromatogram for the rest of the analyses. Compounds were identified by comparing their retention times and mass spectra with those of reference compounds (mix C<sub>8</sub>-C<sub>40</sub> alkanes and 5 $\alpha$ -androstane, Supelco) and with the NIST mass spectra library. Quantification was based on calibration curves obtained by plotting the ratio Area/Area<sub>IS</sub> vs the concentration of each reference compound. Correlation coefficients were higher than 0.995. The *n*-alkane concentration is expressed as  $\mu\text{g}$  of individual compound per gram of dry sample ( $\mu\text{g gds}^{-1}$ ).

## 2.8. Magnetic properties

In order to determine if the materials had been affected by past processes of heating, the magnetic properties of several archaeological samples were analysed (Supplementary Table S5). Eight lithic items in the assemblage present a colour that could be the result of thermal alteration<sup>32</sup> (Figure 7). Two of these samples underwent further analysis: ID #104 and #105. Both are quartzite pebbles, sample ID #104 presenting an intense reddish colour at one of its ends (Figure 7a). We also analysed two sediment samples (ID #93 and #94) located close to the potentially thermally altered zone as well as six unheated sediment control samples from the same stratigraphic unit (ID #95, #96, and #98-#100) located some distance from this zone but presenting the same lithology.

Additionally, cobbles representing three types of local quartzite (samples ID #101-#103) similar to that found at the site were heated under controlled temperature conditions so as to analyse any variation in their respective magnetic properties (Supplementary Figure S7). Fragments of these pebbles were first tested at room temperature and then heated to 300 °C and 600 °C in a TD48-SC (ASC) magnetically shielded oven for 1 h, their magnetic properties being measured after each heating step. The bulk sample (~450 mg) of both the archaeological and experimental materials was measured using a variable field translation balance. The analyses included progressive isothermal remanent magnetization (IRM) acquisition curves, hysteresis cycles ( $\pm 1\text{T}$ ), backfield coercivity

curves and thermomagnetic curves up to 700 °C in air. These analyses were carried out at Burgos University's (Spain) palaeomagnetism laboratory.

The success of rock-magnetic methods for identifying heating processes in archaeological materials largely depends on the detection of significant differences in their magnetic properties – that is, on the composition, concentration and granulometry of their ferromagnetic minerals. The formation of magnetite and/or maghaemite is probably the most common transformation process underwent by the iron-bearing minerals present in heated archaeological materials. These minerals are hundreds of times more magnetic than others, including, for example, haematite <sup>33</sup>, which means that differences in the intensity of the magnetic signal are a useful criterion for identifying heating. However, the neoformation of magnetite is not always recorded<sup>34</sup> and the magnetic properties exhibited by the material will depend on the conditions under which heating took place and the ferromagnetic minerals that were created.

## **SUPPLEMENTARY TEXT 3**

### **3. Other organic materials**

#### **3.1. Bone remains**

Samples ID #45 and #47 were brown bones with no thermal alteration while samples ID #44, #46, #48, #51-#52, #55 and #58 were dark, probably burnt bones. Microscopic analysis showed all samples to present the cellular structure of compact bone tissue with osteons formed by concentric layers around the Havers channels. The osteons are separated by cement lines. The bone was highly altered with a friable consistency. At the lowest pressure, the bone was found to disintegrate.

#### **3.2. Humus**

Samples ID #50-#54, #56-#57 and #59 can be classified as humus. The general appearance of these samples was dark, unstructured organic matter. We classified them as humus because no clear remains of plant or animal cells could be identified. Only in sample ID #51 did we identify some small particles of plant, bone and calcium, the latter possibly representing decaying bones.

**Supplementary Figure S1. a.** Detailed view of the Almonda escarpment showing the location of Gruta da Aroeira. **b.** Stratigraphic profile showing the position of the Aroeira 3 cranium (red star) and the main horizon with burnt elements.

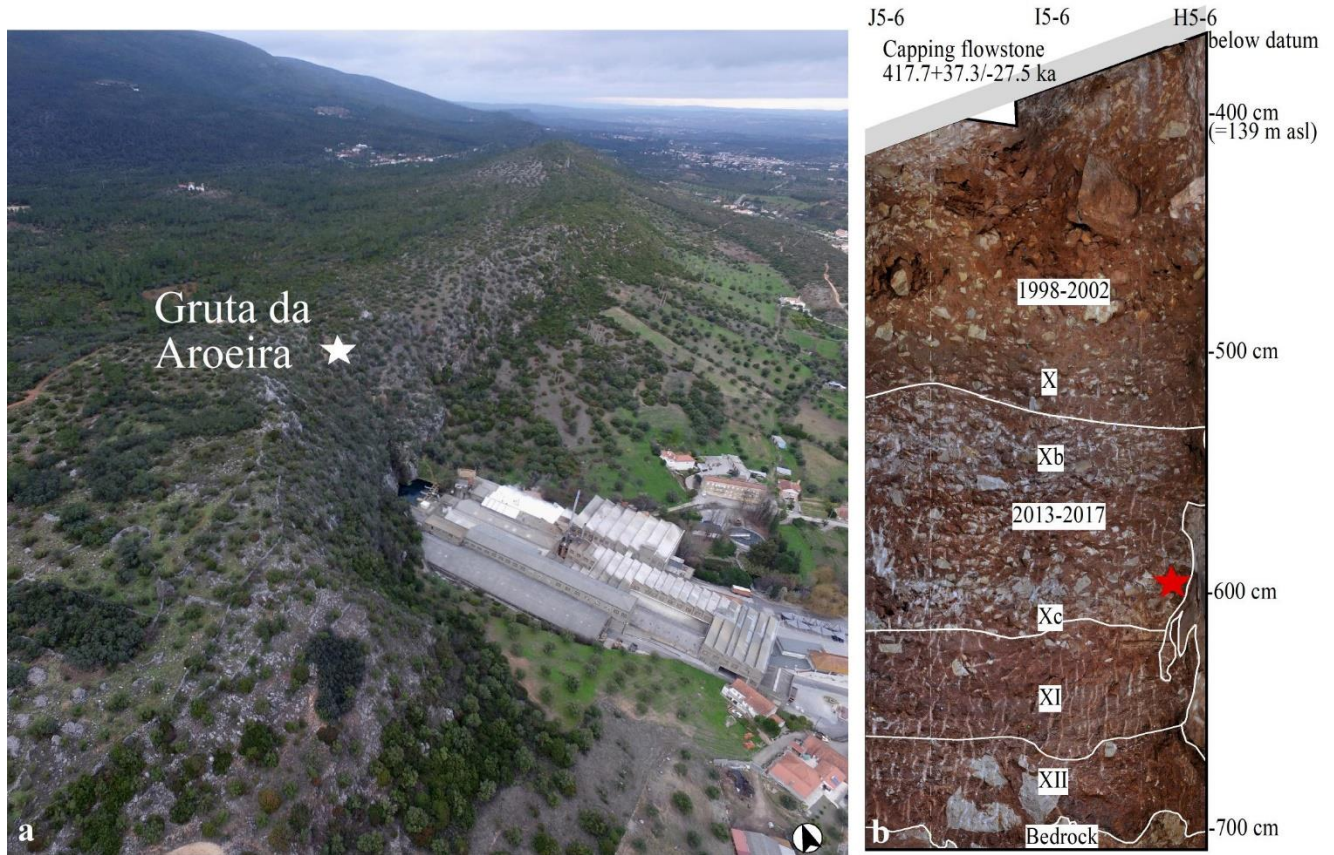

**Supplementary Figure S2.** Control samples. **a.** Manganese coating on deer tooth (sample ID #90). **b.** Manganese coating on long bone (sample ID #91). **c.** Unburnt bone with no manganese coating (sample ID #92).

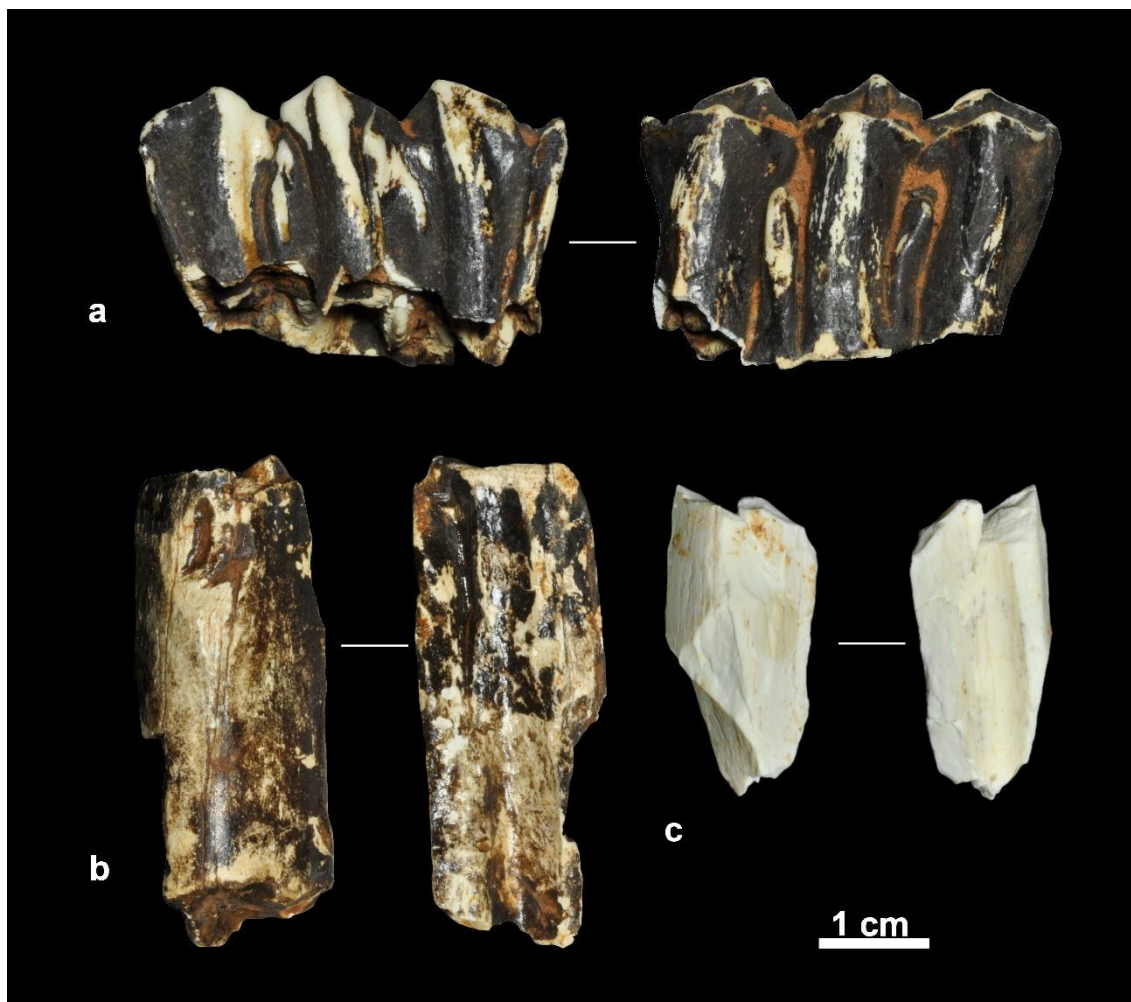

**Supplementary Figure S3.** Elemental proportions in plant tissue samples from Aroeira.

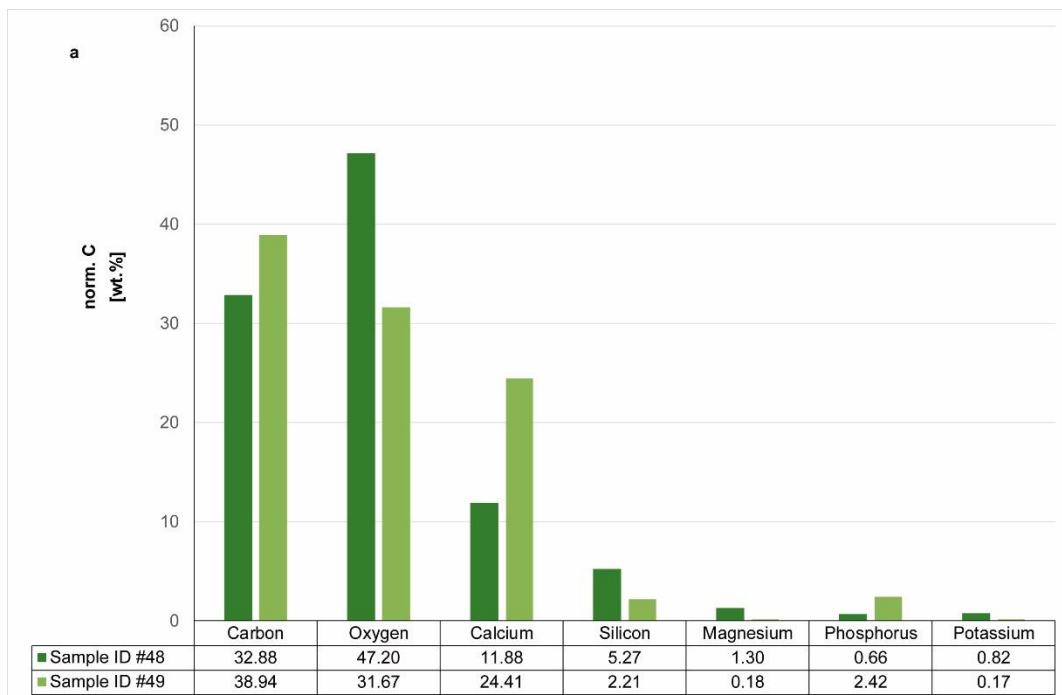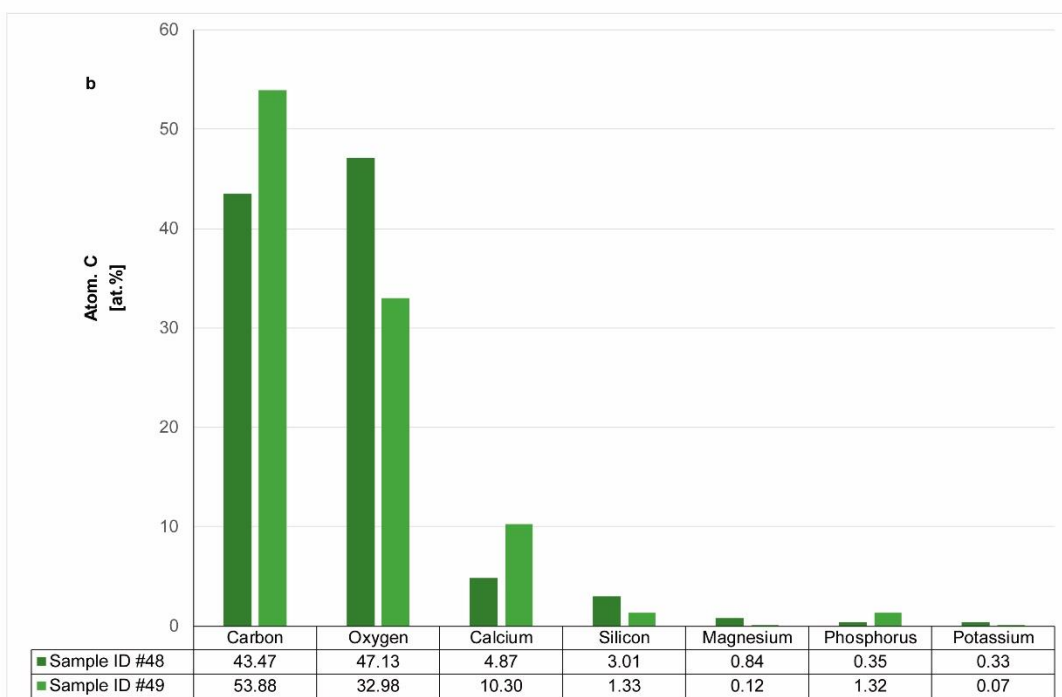

**Supplementary Figure S4. a.** The sequence of four thin-section scans made from the three blocks removed from the column shown in “b” (samples ID #60-#62). **b.** General view of the stratigraphic profile and the three micromorphological samples (indicated in yellow rectangles) spanning the unit where most burnt bones were recovered.

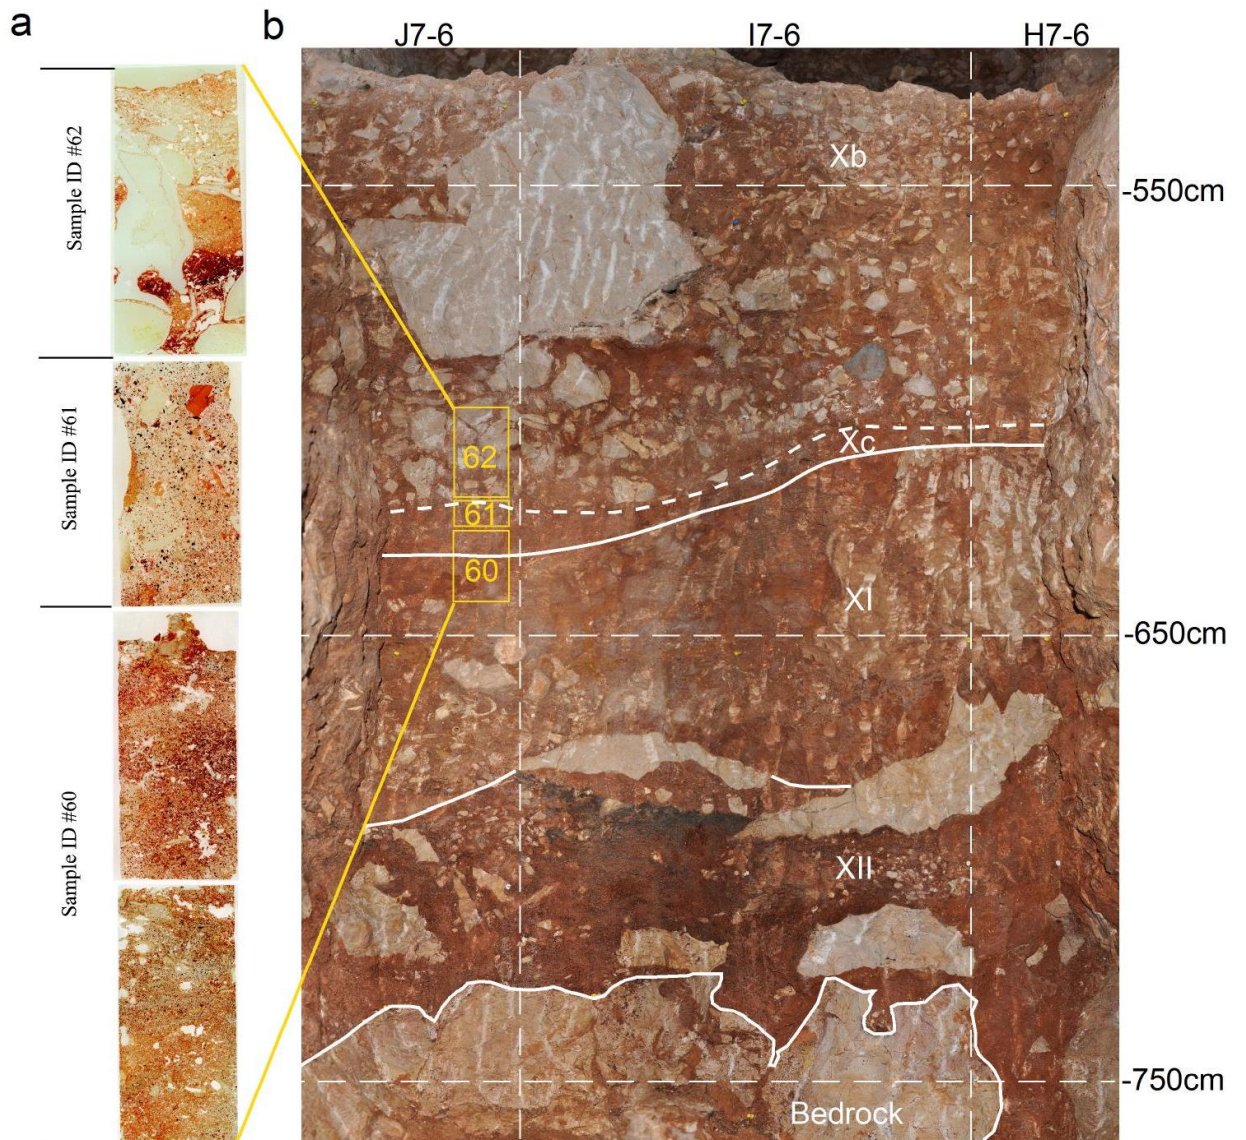

**Supplementary Figure S5.** *N*-Alkane barplot from samples ID #63 and #64 (layers Xc and XI, respectively).

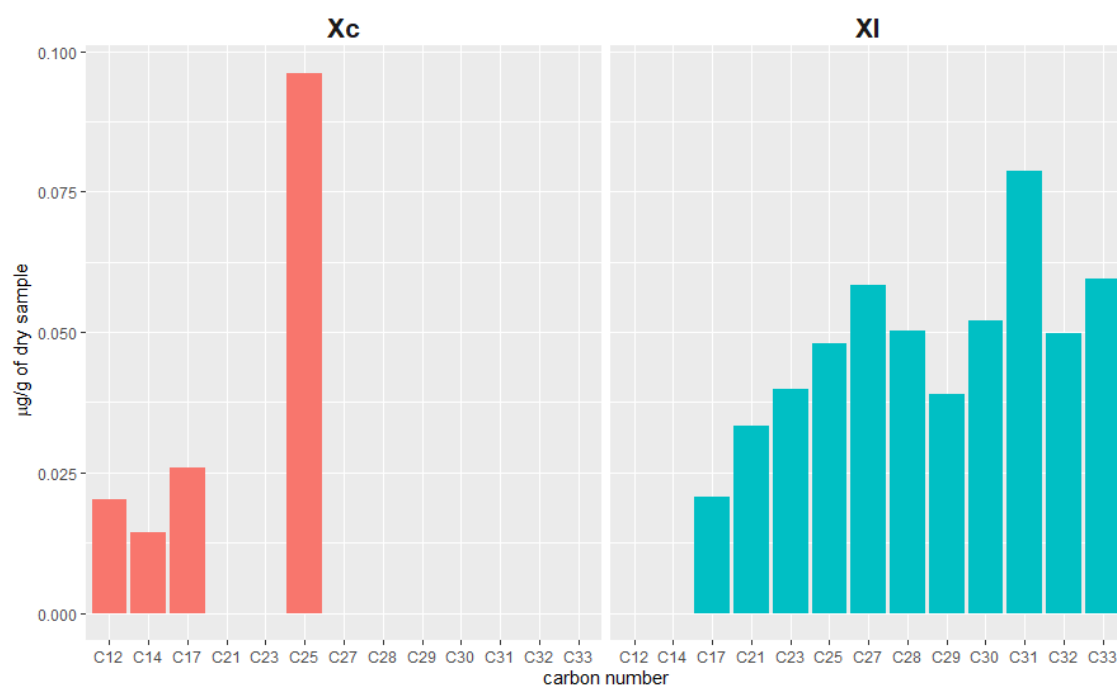



**Supplementary Figure S6.** Thermomagnetic curves (magnetization vs. temperature) of (a) representative sample of sediment lying close to the possible thermally altered area (sample ID #93) and (b) representative sample of sediment lying some distance from the possible thermally altered area (sample ID #99). Heating (cooling) cycles are shown in red (blue) with their respective arrows. Sample code and magnetization values are also indicated.

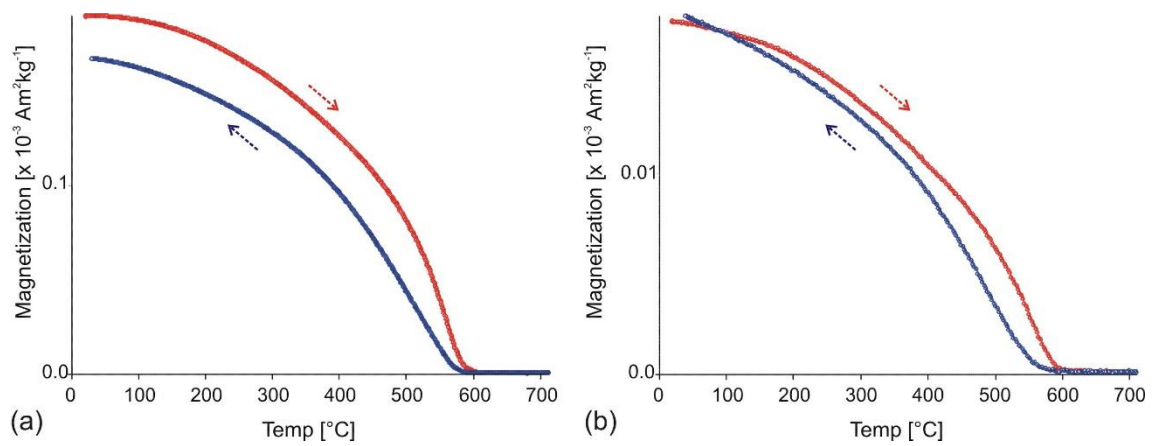

**Supplementary Figure S7.** Local quartzite control samples ID: #101 (**a**), #102 (**b**) and #103 (**c**).

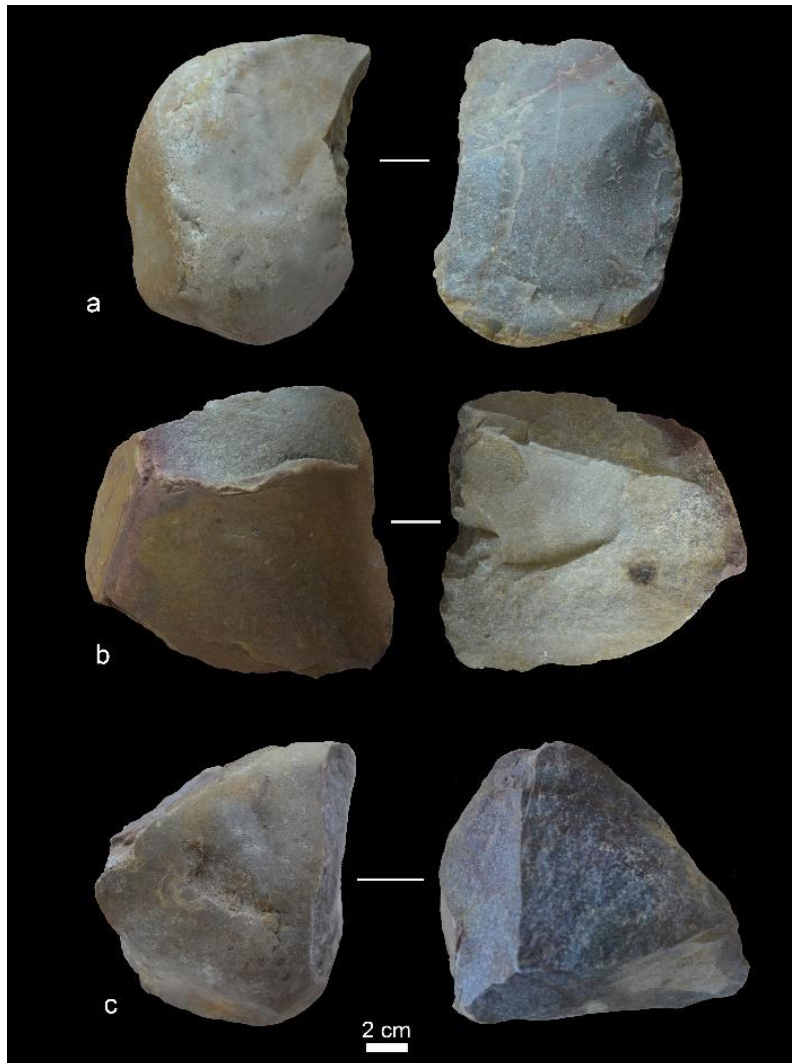

**Supplementary Figure S8.** Variation in the intensity of magnetization as a function of temperature for three local quartzites (samples ID# 101-103). Each point represents the magnetization value in the heating cycle of the thermomagnetic curve at 30 °C ( $J_{30}$ ) after three different increases in temperature: room temperature, 300 °C and 600 °C. Symbols for samples ID #104-105 are the two archaeological quartzites measured at room temperature. Note the high value of sample ID #104\_2d in comparison with its counterparts.

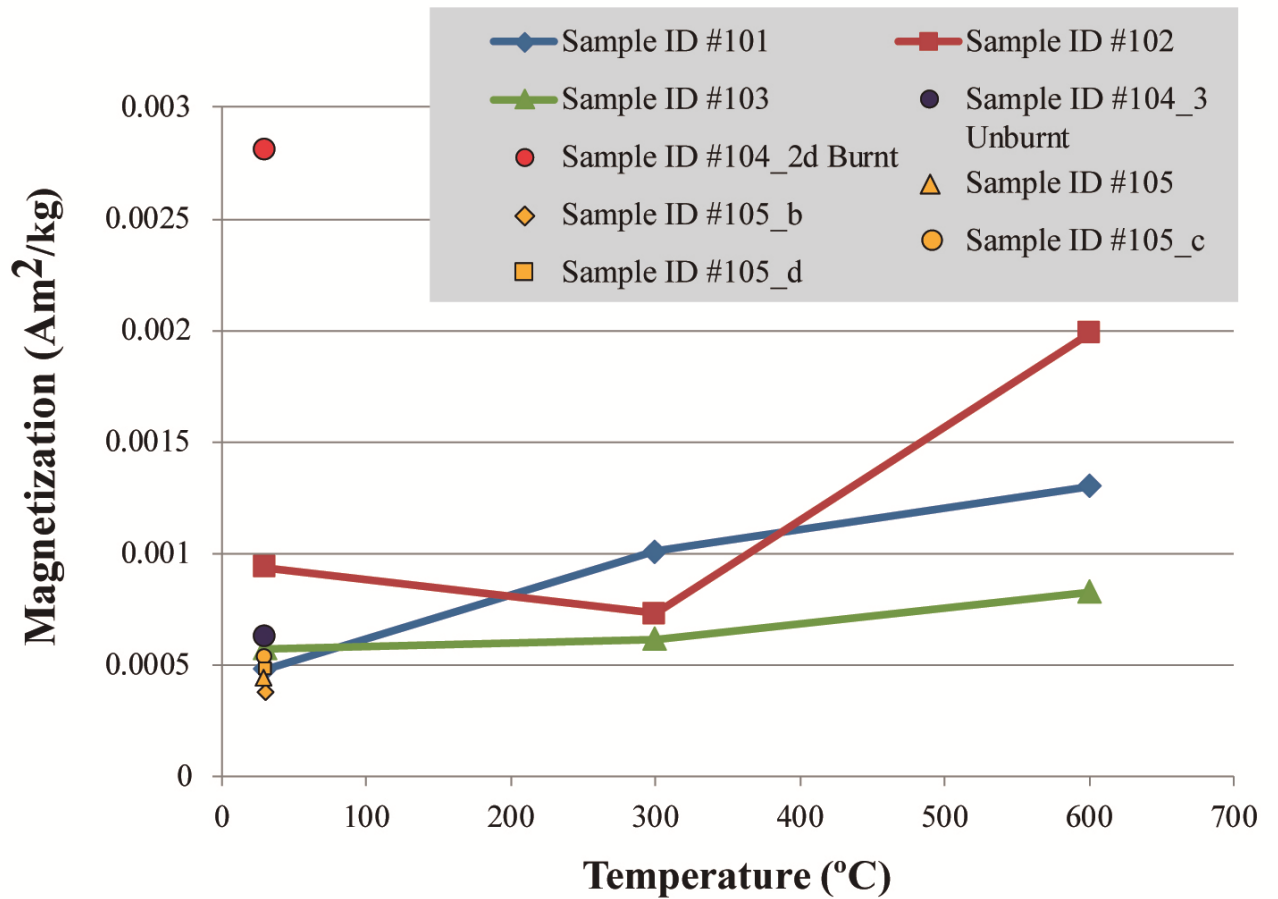

**Supplementary Table S1.** List of all the samples discussed in this paper (taphonomic and zooarchaeological analyses of bones, wood charcoal, micromorphology, organic chemistry, FTIR, XEDS, and magnetic properties analyses).

| Sample ID | Site # | Layer | Material                | Analysis                           | Square | Description         |
|-----------|--------|-------|-------------------------|------------------------------------|--------|---------------------|
| 1         | 124-1  | Xc    | Burnt bone              | Taphonomy/zooarchaeology/FTIR      | J7     | Long bone           |
| 2         | 124-2  | Xc    | Burnt bone              | Taphonomy/zooarchaeology           | J7     | Flat bone           |
| 3         | 130    | Xc    | Burnt bone              | Taphonomy/zooarchaeology/FTIR/XEDS | H7     | Metapodial          |
| 4         | 132    | Xc    | Burnt bone              | Taphonomy/zooarchaeology           | I7     | Epiphysis frag      |
| 5         | 140    | XI    | Burnt bone              | Taphonomy/zooarchaeology           | J7     | Long bone           |
| 6         | 343    | Xb    | Burnt bone              | Taphonomy/zooarchaeology/FTIR/XEDS | I6     | Bone scute          |
| 7         | 408    | Xb    | Burnt bone              | Taphonomy/zooarchaeology           | H6     | Epiphysis           |
| 8         | 559    | Xc    | Burnt bone              | Taphonomy/zooarchaeology           | J6     | Flat bone           |
| 9         | 568    | Xc    | Burnt bone              | Taphonomy/zooarchaeology           | J6     | Long bone           |
| 10        | 586    | Xc    | Burnt bone              | Taphonomy/zooarchaeology/FTIR      | I6     | Long bone           |
| 11        | 587    | Xb/c  | Burnt bone              | Taphonomy/zooarchaeology/FTIR      | I6     | Flat bone           |
| 12        | 607    | Xb    | Burnt bone              | Taphonomy/zooarchaeology           | H6     | Long bone           |
| 13        | 610    | Xc    | Burnt bone              | Taphonomy/zooarchaeology/FTIR      | I6     | Rib                 |
| 14        | 615    | Xc    | Burnt bone              | Taphonomy/zooarchaeology/FTIR      | I6     | Spongy fragment     |
| 15        | 618    | Xc    | Burnt bone              | Taphonomy/zooarchaeology/FTIR      | I6     | Flat bone           |
| 16        | 621    | Xc    | Burnt bone              | Taphonomy/zooarchaeology/FTIR/XEDS | I6     | Flat bone           |
| 17        | 622    | Xc    | Burnt bone              | Taphonomy/zooarchaeology           | I6     | Spongy fragment     |
| 18        | 623    | Xc    | Burnt bone              | Taphonomy/zooarchaeology/FTIR/XEDS | I6     | Mandible            |
| 19        | 628    | Xc    | Burnt bone              | Taphonomy/zooarchaeology           | I6     | Long bone           |
| 20        | 629    | Xc    | Burnt bone              | Taphonomy/zooarchaeology/FTIR/XEDS | I6     | Spongy fragment     |
| 21        | 631    | Xc    | Burnt bone              | Taphonomy/zooarchaeology           | I6     | Flat bone           |
| 22        | 632    | Xc    | Burnt bone              | Taphonomy/zooarchaeology           | I6     | Spongy fragment     |
| 23        | 635    | Xc    | Burnt bone              | Taphonomy/zooarchaeology           | I6     | Spongy fragment     |
| 24        | 637    | Xc    | Burnt bone              | Taphonomy/zooarchaeology/FTIR/XEDS | J6     | Flat bone           |
| 25        | 641    | Xc    | Burnt bone              | Taphonomy/zooarchaeology           | I6     | Spongy fragment     |
| 26        | 642    | Xc    | Burnt bone              | Taphonomy/zooarchaeology           | I6     | Root                |
| 27        | 645    | Xc    | Burnt bone              | Taphonomy/zooarchaeology           | I6     | Rib                 |
| 28        | 729    | Xc    | Burnt bone              | Taphonomy/zooarchaeology           | I6     | Spongy fragment     |
| 29        | 732    | Xb    | Burnt bone              | Taphonomy/zooarchaeology           | I5     | Vertebra            |
| 30        | 881    | Xb    | Burnt bone              | Taphonomy/zooarchaeology/FTIR/XEDS | I8     | Vertebra            |
| 31        | 1438   | Xc/XI | Burnt bone              | Taphonomy/zooarchaeology           | J7     | Flat bone           |
| 32        | 1440   | Xc/XI | Burnt bone              | Taphonomy/zooarchaeology           | J7     | Flat bone           |
| 33        | 1441   | Xc/XI | Burnt bone              | Taphonomy/zooarchaeology/FTIR      | J7     | Flat bone           |
| 34        | 1452   | Xc/XI | Burnt bone              | Taphonomy/zooarchaeology           | J7     | Spongy fragment     |
| 35        | 1454   | Xc/XI | Burnt bone              | Taphonomy/zooarchaeology           | J7     | Spongy fragment     |
| 36        | 1459   | Xc/XI | Burnt bone              | Taphonomy/zooarchaeology           | J7     | Long bone           |
| 37        | 1466   | Xc/XI | Burnt bone              | Taphonomy/zooarchaeology           | J7     | Spongy fragment     |
| 38        | 1471   | Xc/XI | Burnt bone              | Taphonomy/zooarchaeology           | J7     | Epiphysis frag      |
| 39        | 1472   | Xc/XI | Burnt bone              | Taphonomy/zooarchaeology           | J7     | Spongy fragment     |
| 40        | 1488   | Xc/XI | Burnt bone              | Taphonomy/zooarchaeology           | J7     | Epiphysis frag      |
| 41        | 1498   | Xc/XI | Burnt bone              | Taphonomy/zooarchaeology/FTIR      | J7     | Flat bone           |
| 42        | 1502   | Xc/XI | Burnt bone              | Taphonomy/zooarchaeology           | J6     | Flat bone           |
| 43        | 1503   | Xc/XI | Burnt bone              | Taphonomy/zooarchaeology           | J7     | Spongy fragment     |
| 44        | 565    | Xc    | Bone                    | Wood charcoal analysis             | J6     | Probably burnt      |
| 45        | 650    | Xc    | Bone                    | Wood charcoal analysis             | J6     |                     |
| 46        | 566    | Xc    | Bone                    | Wood charcoal analysis             | J6     | Probably burnt      |
| 47        | 620    | Xc    | Bone                    | Wood charcoal analysis             | I6     |                     |
| 48        | 644    | Xc    | Charcoal and bone       | Wood charcoal analysis             | I6     | Probably burnt bone |
| 49        | 1443   | Xc/XI | Charcoal                | Wood charcoal analysis             | J7     |                     |
| 50        | 1444   | Xc/XI | Humus                   | Wood charcoal analysis             | J7     |                     |
| 51        | 1457   | Xc/XI | Charcoal and bone       | Wood charcoal analysis             | J7     | Probably burnt bone |
| 52        | 1458   | Xc/XI | Bone and humus          | Wood charcoal analysis             | J7     | Probably burnt bone |
| 53        | 1460   | Xc/XI | Humus                   | Wood charcoal analysis             | J7     |                     |
| 54        | 1463   | Xc/XI | Humus and microorganism | Wood charcoal analysis             | J7     |                     |

| Sample ID | Site #      | Layer | Material                      | Analysis               | Square | Description                                                      |
|-----------|-------------|-------|-------------------------------|------------------------|--------|------------------------------------------------------------------|
| 55        | 1469        | Xc/XI | Bone                          | Wood charcoal analysis | J7     | Probably burnt                                                   |
| 56        | 1480        | Xc/XI | Humus                         | Wood charcoal analysis | J7     |                                                                  |
| 57        | 1497        | Xc/XI | Bone and humus                | Wood charcoal analysis | J7     |                                                                  |
| 58        | 1499        | Xc/XI | Bone and humus                | Wood charcoal analysis | J7     | Probably burnt bone                                              |
| 59        | 1504        | Xc/XI | Humus                         | Wood charcoal analysis | J7     |                                                                  |
| 60        | 560         | Xc/XI | Sediment                      | Micromorphology        | H6     | Thin section                                                     |
| 61        | 556         | Xc    | Sediment                      | Micromorphology        | J6     | Thin section                                                     |
| 62        | 522         | Xb    | Sediment                      | Micromorphology        | I6     | Thin section                                                     |
| 63        | –           | Xc    | Sediment                      | Organic chemistry      | –      |                                                                  |
| 64        | –           | XI    | Sediment                      | Organic chemistry      | –      |                                                                  |
| 65        | 580         | Xb    | Unburnt bone                  | FTIR                   | I6     |                                                                  |
| 66        | 254         | Xb    | Unburnt bone                  | FTIR                   | I6     |                                                                  |
| 67        | 277         | Xb    | Unburnt bone                  | FTIR                   | I6     |                                                                  |
| 68        | 880         | Xb    | Unburnt bone                  | FTIR                   | J8     |                                                                  |
| 69        | 543         | Xb    | Unburnt bone                  | FTIR                   | I6     |                                                                  |
| 70        | 831         | Xb    | Unburnt bone                  | FTIR                   | I8     |                                                                  |
| 71        | 314         | Xb    | Unburnt bone                  | FTIR                   | I6     |                                                                  |
| 72        | 235         | Xb    | Unburnt bone                  | FTIR                   | J6     |                                                                  |
| 73        | 251         | Xb    | Unburnt bone                  | FTIR                   | I6     |                                                                  |
| 74        | 386         | Xb    | Unburnt bone                  | FTIR                   | I6     |                                                                  |
| 75        | 456         | Xb    | Unburnt bone                  | FTIR                   | I6     |                                                                  |
| 76        | 928         | XI    | Unburnt bone                  | FTIR                   | I7     |                                                                  |
| 77        | 96          | Xb    | Sediment                      | FTIR                   | J7     | Red clay. Not rubefacted sediment                                |
| 78        | 19          | F     | Sediment                      | FTIR                   | H7     | Not rubefacted sediment                                          |
| 79        | 20          | F     | Sediment                      | FTIR                   | I7     | Not rubefacted sediment                                          |
| 80        | 586-1       | X     | Sediment                      | FTIR                   | I6     | Sediment attached to burnt bone #586                             |
| 81        | 551         | Xb    | Sediment                      | FTIR                   | I6     | Not rubefacted sediment                                          |
| 82        | 54          | Xb    | Sediment                      | FTIR                   | I7     | Not rubefacted sediment                                          |
| 83        | 918         | Xb    | Sediment                      | FTIR                   | I6     | Not rubefacted sediment                                          |
| 84        | 928-1       | XI    | Sediment                      | FTIR                   | I7     | Sediment attached to unburnt bone #928                           |
| 85        | 615-1       | Xc    | Sediment                      | FTIR                   | I6     | Sediment attached to burnt bone #615                             |
| 86        | 1498-1      | Xc    | Sediment                      | FTIR                   | J7     | Sediment attached to burnt bone #1498-1                          |
| 87        | 1508        | Xc    | Sediment                      | FTIR                   | J7     |                                                                  |
| 88        | 572         | Xc    | Sediment                      | FTIR                   | J6     | Reddish sediment                                                 |
| 89        | –           | XI    | Sediment                      | FTIR                   | H7     | Black nodule                                                     |
| 90        | Praia 1     | –     | Deer tooth                    | XEDS                   | –      | Manganese coating. Control sample                                |
| 91        | Praia 2     | –     | Bone                          | XEDS                   | –      | Manganese coating. Control sample                                |
| 92        | 332         | Xb    | Bone                          | XEDS                   | I6     | Unburnt bone. Control sample                                     |
| 93        | 1444        | Xc    | Sediment                      | Magnetic properties    | J7     | Sediment with burnt bones                                        |
| 94        | 1442        | Xc    | Sediment                      | Magnetic properties    | J7     | Sediment with burnt bones                                        |
| 95        | 738         | XI    | Sediment                      | Magnetic properties    | I5     | Sediment attached to quartzite #738. Unheated sediment.          |
| 96        | 156         | XI    | Sediment                      | Magnetic properties    | I7     | Sediment attached to unburnt bone #156                           |
| 97        | 238         | Xb    | Sediment                      | Magnetic properties    | J6     | Sediment attached to unburnt bone #238                           |
| 98        | 2017-1      | Xa    | Sediment                      | Magnetic properties    | J6-7-8 | Unheated sediment. Control sample                                |
| 99        | 898         | Xb    | Sediment                      | Magnetic properties    | H6     | Sediment attached to unburnt bone #898                           |
| 100       | 2014-1      | Xb    | Sediment                      | Magnetic properties    | I-J-H6 | Unheated sediment. Control sample                                |
| 101       | Quartzite 1 | –     | Experimental quartzite cobble | Magnetic properties    | –      | Local quartzite from Aroeira surroundings. Experimental analysis |

| Sample ID | Site #      | Layer | Material                        | Analysis            | Square | Description                                                      |
|-----------|-------------|-------|---------------------------------|---------------------|--------|------------------------------------------------------------------|
| 102       | Quartzite 2 | –     | Experimental quartzite cobble   | Magnetic properties | –      | Local quartzite from Aroeira surroundings. Experimental analysis |
| 103       | Quartzite 3 | –     | Experimental quartzite cobble   | Magnetic properties | –      | Local quartzite from Aroeira surroundings. Experimental analysis |
| 104       | 262         | Xb    | Archaeological quartzite cobble | Magnetic properties | I6     | Possible thermal alteration                                      |
| 105       | 591         | Xb    | Archaeological quartzite cobble | Magnetic properties | I6     | Possible thermal alteration                                      |
| 106       | 265         | Xb    | Archaeological quartzite cobble |                     | I6     | Possible thermal alteration                                      |
| 107       | 334         | Xb    | Archaeological quartzite cobble |                     | I6     | Possible thermal alteration                                      |
| 108       | 846         | Xb    | Archaeological quartzite cobble |                     | I8     | Possible thermal alteration                                      |
| 109       | 353         | Xb    | Archaeological quartzite cobble |                     | I6     | Possible thermal alteration                                      |
| 110       | 299         | Xb    | Archaeological quartzite cobble |                     | I6     | Possible thermal alteration                                      |
| 111       | 340         | Xb    | Archaeological quartzite cobble |                     | I6     | Possible thermal alteration                                      |

**Supplementary Table S2.** Degree of burning presented by thermally modified bones from layer X based on visual alteration<sup>12</sup>.

| <b>Burning degree</b> | <b>Description</b>                              | <b>NR</b> | <b>%NR</b> |
|-----------------------|-------------------------------------------------|-----------|------------|
| 1                     | slightly burned                                 | 2         | 5          |
| 2                     | more than half carbonized                       | 7         | 16         |
| 3                     | fully carbonized                                | 22        | 51         |
| 4                     | slightly calcined                               | 2         | 5          |
| 5                     | more than half calcined                         | 6         | 14         |
| 6                     | fully calcined with the colour completely white | 4         | 9          |
| <b>Total</b>          |                                                 | <b>43</b> | <b>100</b> |

**Supplementary Table S3.** Energy-dispersive X-ray spectroscopy results for the samples analysed.

| Sample ID | Site #  | C     | N    | O     | F    | Na   | Mg    | Al   | Si    | P     | S    | Cl   | K    | Ca    | Ti   | Mn   | Fe   | Cu   | Zn   |
|-----------|---------|-------|------|-------|------|------|-------|------|-------|-------|------|------|------|-------|------|------|------|------|------|
| 3         | 130     | 34.76 |      | 22.54 |      |      |       |      |       | 8     |      |      |      | 32.82 |      |      |      | 0.83 | 1.05 |
| 3         | 130     | 21.8  |      | 32.53 |      |      |       |      | 0.15  | 0.44  |      |      |      | 43.9  |      |      |      | 1.19 |      |
| 3         | 130     | 31.2  |      | 55.95 |      | 0.34 |       |      |       | 5.04  |      |      |      | 7.22  |      |      |      | 0.13 | 0.12 |
| 6         | 343     | 13.69 |      | 66    |      | 0.22 |       |      |       | 8.41  |      |      |      | 11.53 |      |      |      | 0.15 |      |
| 6         | 343     | 23.25 |      | 63.08 |      | 0.18 |       | 0.15 | 0.18  | 5.43  |      |      |      | 7.56  |      |      |      | 0.17 |      |
| 6         | 343     | 14.08 |      | 63.68 |      | 0.18 |       | 1.86 | 2.13  | 6.99  |      |      | 0.06 | 10.09 |      |      | 0.45 | 0.22 | 0.27 |
| 16        | 621     | 16.7  |      | 58.58 | 1.11 | 0.38 |       |      |       | 9.12  |      |      |      | 13.85 |      |      |      | 0.26 |      |
| 16        | 621     | 20.37 |      | 53.37 | 0.84 | 0.38 |       |      |       | 9.32  |      | 0.13 |      | 15.04 |      |      |      | 0.24 | 0.3  |
| 16        | 621     | 18.02 |      | 64.79 |      | 0.13 | 0.2   | 5.95 | 5.6   | 1.09  |      |      | 0.14 | 1.57  | 0.09 |      | 2.28 | 0.14 |      |
| 16        | 621     | 24.4  |      | 65.41 |      |      |       | 1.3  | 1.19  |       |      |      |      | 7.39  |      |      | 0.17 | 0.15 |      |
| 18        | 623     | 70.3  |      | 24.49 |      |      | 2.29  | 0.57 | 1.7   |       |      |      |      |       |      |      | 0.37 | 0.14 | 0.14 |
| 18        | 623     | 47.16 | 8.93 | 37.26 |      | 0.24 | 2.62  |      | 3.09  |       | 0.18 | 0.14 | 0.14 | 0.04  |      |      |      | 0.1  | 0.1  |
| 18        | 623     | 11.24 |      | 63.48 |      |      | 11.06 |      | 14.01 |       |      |      |      |       |      |      |      | 0.21 |      |
| 20        | 629     | 38.61 |      | 52.29 |      |      |       | 0.15 | 0.14  | 1.27  |      |      |      | 7.18  |      |      | 0.08 | 0.16 | 0.12 |
| 20        | 629     | 25.11 |      | 51.23 |      | 0.18 |       | 0.18 | 0.14  | 4.68  |      |      |      | 17.68 |      |      |      | 0.46 | 0.33 |
| 20        | 629     | 27.74 |      | 43.37 |      |      |       | 0.16 | 0.17  | 0.37  |      |      |      | 26.96 |      |      |      | 0.62 | 0.6  |
| 24        | 637     | 17.38 |      | 53.11 | 1    | 0.4  |       | 0.61 | 0.38  | 10.31 |      | 0.12 |      | 16.4  |      |      |      | 0.3  |      |
| 24        | 637     | 22.12 |      | 59.98 | 1.57 | 0.31 |       | 0.15 | 0.16  | 5.08  |      |      |      | 10.32 |      |      |      | 0.14 | 0.16 |
| 30        | 881     | 22.59 |      | 62.19 |      |      |       |      |       |       |      |      |      | 15.22 |      |      |      |      |      |
| 30        | 881     | 24.3  |      | 59.36 |      |      |       | 0.38 | 0.42  | 0.16  |      |      |      | 14.95 |      |      | 0.22 | 0.21 |      |
| 30        | 881     | 36.64 |      | 21.71 |      |      |       |      |       | 3.42  |      |      |      | 36.4  |      |      |      | 1.82 |      |
| 30        | 881     | 41.36 |      | 49.94 |      | 0.24 |       |      |       | 3.59  |      |      |      | 4.87  |      |      |      |      |      |
| 90        | Praia 1 | 50.99 |      | 38.41 |      |      | 0.1   | 2.88 | 1.44  | 0.15  |      |      |      | 1.13  | 0.08 | 3.02 | 1.58 | 0.21 |      |
| 91        | Praia 2 | 34.4  |      | 53.78 |      |      | 0.16  | 2.14 | 1.45  | 2.08  |      |      | 0.07 | 3.29  |      | 1.68 | 0.7  | 0.11 | 0.14 |
| 91        | Praia 2 | 30.88 |      | 56.38 |      |      | 0.22  | 3.68 | 2.31  | 0.65  |      |      | 0.07 | 1.41  |      | 3.04 | 1.07 | 0.16 | 0.16 |
| 92        | 332     | 15.93 |      | 59.8  |      |      |       |      |       | 9.38  |      |      |      | 14.6  |      |      |      | 0.29 |      |
| 92        | 332     | 12.38 |      | 68.78 |      | 0.28 |       |      |       | 7.52  |      |      |      | 10.64 |      |      |      | 0.21 | 0.18 |
| 92        | 332     | 13.13 |      | 67.34 |      | 0.25 |       |      |       | 7.8   |      |      |      | 11.04 |      |      |      | 0.25 | 0.19 |



**Supplementary Table S4. a.** Superposition of four thin-section scans made from the three blocks removed from the column shown in “Supplementary Figure S4” with the microfacies identified. **b.** Description of the 12 microfacies identified.

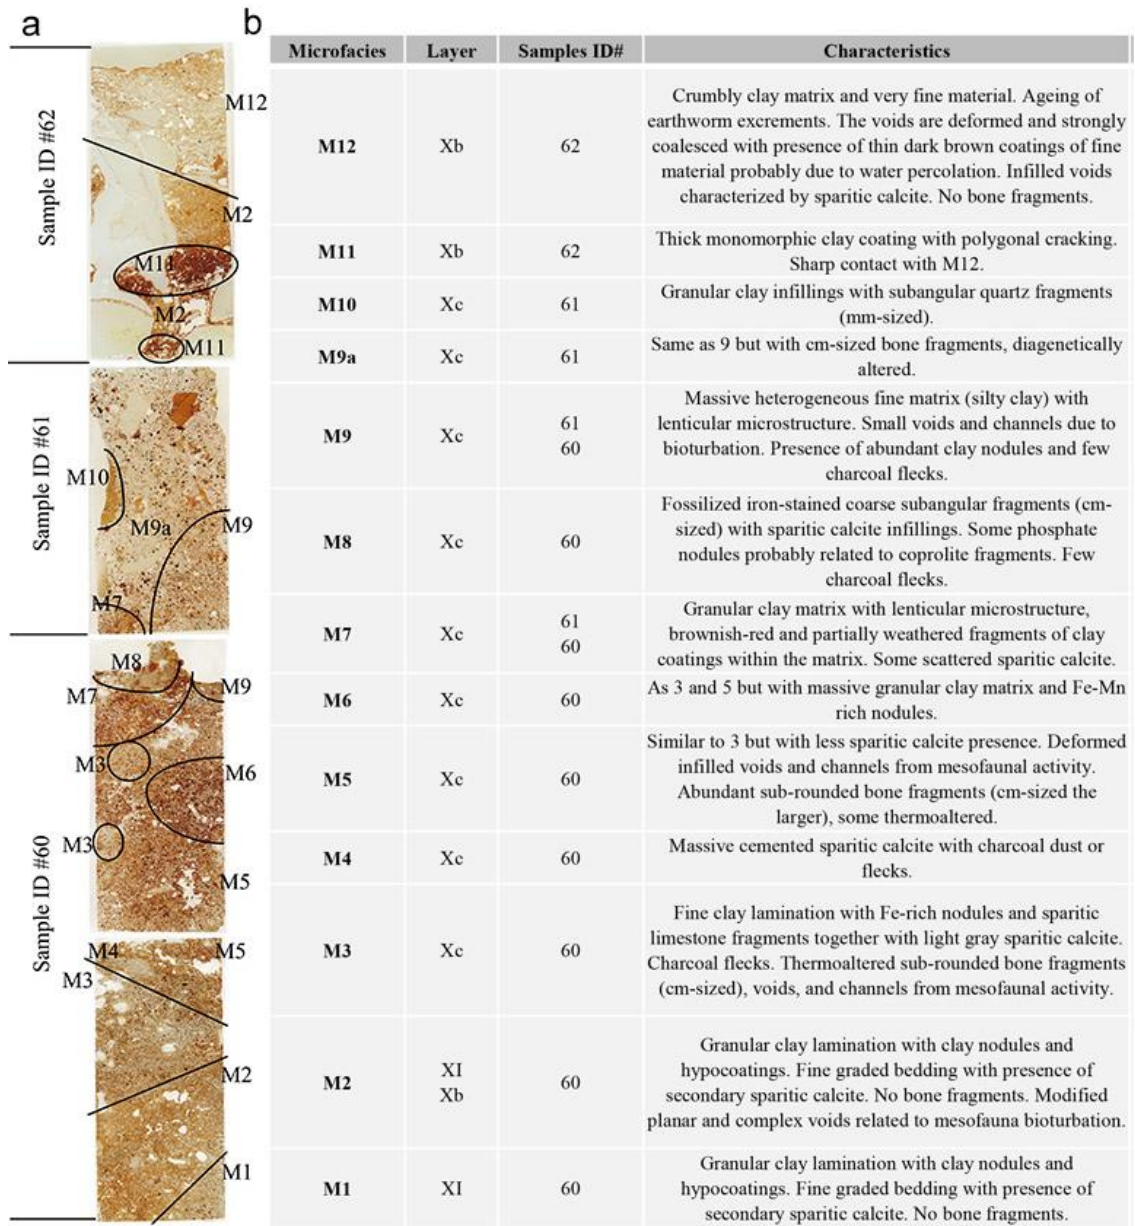

**Supplementary Table S5.** Magnetic properties of materials studied, including archaeological and experimental quartzites and archaeological sediment samples. From left to right:  $J_{30}$  (magnetization value of the heating cycle of the thermomagnetic curve at 30 °C);  $M_s$  (Saturation magnetization),  $M_{rs}$  (remanent saturation magnetization),  $B_c$  (coercive field) and  $B_{cr}$  (remanent coercive field). “Non interp.” = non-interpretable thermomagnetic curves. Units for  $J_{30}$ ,  $M_s$  and  $M_{rs}$  are  $\text{Am}^2\text{kg}^{-1}$ . Units for  $B_c$  and  $B_{cr}$  are milliteslas or mT. In the experimental quartzites the code “PRE” refers to samples measured at room temperature (unheated) and “300” and “600” refer to samples heated to 300 °C and 600 °C, respectively.

| Material                         | Sample ID# | Sample code      | $J_{30}$           | $M_s$    | $M_{rs}$ | $B_c$ | $B_{cr}$ | Observations               |
|----------------------------------|------------|------------------|--------------------|----------|----------|-------|----------|----------------------------|
| Archaeological quartzite cobbles | 104        | ARO262 2 unburnt | <i>Non interp.</i> | 6.63E-04 | 2.06E-04 | 27.5  | 109      | cobble #262                |
|                                  | 104        | ARO262 3 unburnt | 6.31E-04           | 8.00E-04 | 2.33E-04 | 26.5  | 111.6    | cobble #262                |
|                                  | 104        | ARO_262_2a-burnt | <i>Non interp.</i> | 1.21E-03 | 2.86E-04 | 18.2  | 29.3     | cobble #262 (reddened end) |
|                                  | 104        | ARO 262 2d-burnt | 2.81E-03           | 7.54E-03 | 8.81E-04 | 13.9  | 32.4     | cobble #262 (reddened end) |
|                                  | 105        | ARO_591          | 5.00E-04           | 8.55E-04 | 1.52E-04 | 11.7  | 30.1     | cobble #591                |
|                                  | 105        | ARO_591b         | 4.10E-04           | 8.31E-04 | 1.56E-04 | 12    | 28       | cobble #591                |
|                                  | 105        | ARO_591c         | 5.80E-04           | 7.65E-04 | 1.49E-04 | 11.8  | 32.4     | cobble #591                |
|                                  | 105        | ARO_591d         | 4.80E-04           | 6.76E-04 | 1.15E-04 | 19.9  | 34.1     | cobble #591                |
| Experimental quartzites          | 101        | 1D_PREa          | 3.12E-04           | 3.14E-04 | 6.11E-05 | 14.8  | 65.1     | Quartzite 1– room temp.    |
|                                  | 101        | 1D_300a          | 4.15E-04           | 4.36E-04 | 8.86E-05 | 16.4  | 48.2     | Quartzite 1– heated 300°C  |
|                                  | 101        | 1D_600a          | 8.50E-04           | 1.83E-03 | 5.73E-04 | 21    | 28       | Quartzite 1– heated 600°C  |
|                                  | 102        | 2B_PREa          | 9.39E-04           | 2.56E-03 | 4.04E-04 | 22.8  | 291      | Quartzite 2– room temp.    |
|                                  | 102        | 2B_300a          | 7.30E-04           | 8.03E-04 | 3.79E-04 | 61.8  | 409.5    | Quartzite 2– heated 300°C  |
|                                  | 102        | 2B_600a          | 1.99E-03           | 2.73E-03 | 1.08E-03 | 24.5  | 37.8     | Quartzite 2– heated 600°C  |
|                                  | 103        | 3D_PREa          | 5.75E-04           | 4.27E-04 | 2.90E-04 | 114.4 | 436.5    | Quartzite 3– room temp.    |
|                                  | 103        | 3D_300a          | 6.18E-04           | 3.59E-04 | 3.16E-04 | 103.8 | 358.6    | Quartzite 3– heated 300°C  |
|                                  | 103        | 3D_600a          | 8.27E-04           | 1.12E-03 | 4.23E-04 | 35    | 98.4     | Quartzite 3– heated 600°C  |
| Archaeological sediment samples  | 93         | ARO-17.1444      | 1.18E-01           | 3.04E-01 | 5.23E-02 | 8.1   | 17.6     | Burnt sample               |
|                                  | 94         | ARO-17.1442      | 2.01E-01           | 3.56E-01 | 5.21E-02 | 7.8   | 17.1     | Burnt sample               |
|                                  | 97         | NQ-Xb-J6-238     | 1.87E-02           | 3.63E-02 | 4.63E-03 | 7.4   | 17.8     | Unburnt control sample     |
|                                  | 100        | NQ-Xb-I-J-H6     | 2.42E-02           | 3.56E-02 | 6.34E-03 | 7.1   | 16.9     | Unburnt control sample     |
|                                  | 99         | NQ-H6-Xb-898     | 1.78E-02           | 2.72E-02 | 4.90E-03 | 7.7   | 17       | Unburnt control sample     |
|                                  | 96         | NQ_XI-17-156     | 1.15E-01           | 1.86E-01 | 2.82E-02 | 7.4   | 16.5     | Unburnt control sample     |
|                                  | 98         | NQ-Xa-J6-7-8     | 3.56E-02           | 5.28E-02 | 9.62E-03 | 7.7   | 17.3     | Unburnt control sample     |
|                                  | 95         | NQ_XI-IS-738     | 2.67E-01           | 4.20E-01 | 7.58E-02 | 8.5   | 17.9     | Unburnt control sample     |

## References:

1. Zilhão, J., Maurício, J. & Souto, P. Jazidas arqueológicas do sistema cársico da nascente do Almonda. *Nov. Augusta* **7**, 35–54 (1993).
2. Marks, A. E. *et al.* Le gisement Pléistocène moyen de Galeria Pesada, (Estrémadure, Portugal) : premiers résultats. *Paléo* **14**, 77–100 (2002).
3. Hoffmann, D. L., Pike, A. W. G., Wainer, K. & Zilhão, J. New U-series results for the speleogenesis and the Palaeolithic archaeology of the Almonda karstic system (Torres Novas, Portugal). *Quat. Int.* **294**, 168–182 (2013).
4. Daura, J. *et al.* New Middle Pleistocene hominin cranium from Gruta da Aroeira (Portugal). *Proc. Natl. Acad. Sci.* **114**, 3397–3402 (2017).
5. Croitor, R., Sanz, M. & Daura, J. Deer remains from the Middle Pleistocene site of Gruta da Aroeira (Portugal): Iberian faunal endemism and implications for hominin paleobiogeography. *Quat. Sci. Rev.* **225**, 106022 (2019).
6. Alba, D. M. *et al.* New macaque remains from the Middle Pleistocene of Gruta da Aroeira (Almonda karst system, Portugal). *J. Hum. Evol.* **131**, 40–47 (2019).
7. Marks, A. E. *et al.* Excavations at the late Middle Pleistocene cave of Galeria Pesada: 1997/1999. *O Arqueólogo Port.* **20**, 7–38 (2002).
8. Reitz, E. J. & Wing, E. S. Zooarchaeology. (2008).
9. Stiner, M. C. *The faunas of Hayonim Cave, Israel: A 200,000-year record of Paleolithic diet, demography, and society.* (Harvard University Press, USA, 2005).
10. Fernández-Jalvo, Y. & Andrews, P. *Atlas of Taphonomic Identifications.* (Springer Netherlands, 2016). doi:10.1007/978-94-017-7432-1
11. Lyman, R. L. *Vertebrate Taphonomy.* Cambridge University Press (Cambridge University Press, 1994). doi:10.1017/CBO9781139878302
12. Stiner, M. C., Kuhn, S. L., Weiner, S. & Bar-Yosef, O. Differential burning, recrystallization, and fragmentation of archaeological bone. *J. Archaeol. Sci.* **22**, 223–237 (1995).
13. Poduska, K. M. *et al.* Decoupling Local Disorder and Optical Effects in Infrared Spectra: Differentiating Between Calcites with Different Origins. *Adv. Mater.* **23**, 550–554 (2011).
14. Regev, L., Poduska, K. M., Addadi, L., Weiner, S. & Boaretto, E. Distinguishing between calcites formed by different mechanisms using infrared spectrometry: archaeological applications. *J. Archaeol. Sci.* **37**, 3022–3029 (2010).
15. Berna, F. *et al.* Sediments exposed to high temperatures: reconstructing pyrotechnological processes in Late Bronze and Iron Age Strata at Tel Dor (Israel). *J. Archaeol. Sci.* **34**, 358–373 (2007).

16. Weiner, S. & Bar-Yosef, O. States of preservation of bones from prehistoric sites in the Near East: A survey. *J. Archaeol. Sci.* **17**, 187–196 (1990).
17. Wright, L. E. & Schwarcz, H. P. Infrared and Isotopic Evidence for Diagenesis of Bone Apatite at Dos Pilas, Guatemala: Palaeodietary Implications. *J. Archaeol. Sci.* **23**, 933–944 (1996).
18. Surovell, T. A. & Stiner, M. C. Standardizing Infra-red Measures of Bone Mineral Crystallinity: an Experimental Approach. *J. Archaeol. Sci.* **28**, 633–642 (2001).
19. Sawerysyn, J. La combustion du bois et ses impacts sur la qualité de l'air. *Air Pur* (2012).
20. Ragland, K. W., Aerts, D. J. & Baker, A. J. Properties of wood for combustion analysis. *Bioresour. Technol.* **37**, 161-168 (1991). doi:10.1016/0960-8524(91)90205-X
21. Bullock, P., Fedoroff, N., Jongerius, A., Stoops, G. & Tursina, T. *Handbook for soil thin section description*. (Waine Research, Wolverhampton, UK., 1985).
22. Courty, M.-A., Goldberg, P. & Macphail, R. I. Soils and micromorphology in archaeology. (Cambridge University Press, Cambridge, UK, 1989).
23. Stoops, G., Marcelino, V. & Mees, F. *Interpretation of Micromorphological Features of Soils and Regoliths*. (Elsevier, 2010). doi:10.1016/C2009-0-18081-9
24. Stoops, G. *Guidelines for analysis and description of soil and regolith thin sections*. (Soil Science Society of America, Inc. Madison, USA, 2003).
25. Goldberg, P. *et al.* Bedding, hearths, and site maintenance in the Middle Stone Age of Sibudu Cave, KwaZulu-Natal, South Africa. *Archaeol. Anthropol. Sci.* **1**, 95–122 (2009).
26. Bhattacharya, S., Dutta, S. & Summons, R. E. A distinctive biomarker assemblage in an Infracambrian oil and source rock from western India: Molecular signatures of eukaryotic sterols and prokaryotic carotenoids. *Precambrian Res.* **290**, 101–112 (2017).
27. Jambrina-Enríquez, M., Herrera-Herrera, A. V. & Mallol, C. Wax lipids in fresh and charred anatomical parts of the *Celtis australis* tree: Insights on paleofire interpretation. *Org. Geochem.* **122**, 147–160 (2018).
28. Brittingham, A. *et al.* Geochemical Evidence for the Control of Fire by Middle Palaeolithic Hominins. *Sci. Rep.* **9**, 15368 (2019).
29. Eglinton, G. & Hamilton, R. J. Leaf epicuticular waxes. *Science.* **156**, 1322–1335 (1967).
30. Rieley, G. *et al.* Sources of sedimentary lipids deduced from stable carbon-isotope analyses of individual compounds. *Nature* **352**, 425–427 (1991).
31. Otto, A. & Simpson, M. J. Degradation and preservation of vascular plant-derived biomarkers in grassland and forest soils from Western Canada.

- Biogeochemistry* **74**, 377–409 (2005).
32. Daura, J. *et al.* A 400,000-year-old Acheulean assemblage associated with the Aroeira-3 human cranium (Gruta da Aroeira, Almonda karst system, Portugal). *Comptes Rendus Palevol* **17**, 594–615 (2018).
  33. Evans, M. E. . & Heller, F. *Environmental Magnetism: Principles and Applications of Environmagnetics*. (Academic Press, 2003).
  34. Maki, D., Homburg, J. A. & Brosowske, S. D. Thermally activated mineralogical transformations in archaeological hearths: Inversion from maghemite  $\gamma\text{Fe}_2\text{O}_4$  phase to haematite  $\alpha\text{Fe}_2\text{O}_4$  form. *Archaeol. Prospect.* **13**, 207-227 (2006).  
doi:10.1002/arp.277
